# Supplementary material
Source: PubMed Central journal article supplement (PMC5801358)
Supplement: ajtr0010-0200-f6.pdf [file ajtr0010-0200-f6.pdf]

## The role of Phf19 in rheumatoid arthritis

**Supplementary Table 1.** Primers used in this study

| Primer       | Forward                      | Reverse                     |
|--------------|------------------------------|-----------------------------|
| Mouse phf19  | 5'-CTATGCAGGTGGACAGACGG-3'   | 5'-TCAACTGCGATGGGGATGTG-3'  |
| Human phf19  | 5'-TGGCCTGTACTACCTCGGG-3'    | 5'-CTATGGGGATGTGGCACTGCT-3' |
| Mouse bcl-xl | 5'-GTCGCATCGTGGCCTTTTTC-3'   | 5'-CAGGAACCAGCGGTTGAAGC-3'  |
| Mouse ccnd2  | 5'-TACCTCCCGCAGTGTTCCTA-3'   | 5'-GCCAAGAAACGGTCCAGGTA-3'  |
| Mouse gapdh  | 5'-GGGTCCCAGCTTAGGTTTCATC-3' | 5'-TACGGCCAAATCCGTTTACA-3'  |
| Human gapdh  | 5'-CAGGAACCAGCGGTTGAAGC-3'   | 5'-TGGACTCCACGACGTACTCA-3'  |
